# Supplementary material for: High Antitumor Activity of the Dual Topoisomerase Inhibitor P8-D6 in Breast Cancer
Source: MDPI journal article supplement (doi:10.3390/cancers14010002), 2021-12-21
Supplement: s1 [file s1]

# Supplement Materials: High Antitumor Activity of the Dual Topoisomerase Inhibitor P8-D6 in Breast Cancer

Inken Flörkemeier, Tamara N. Steinhauer, Nina Hedemann, Jörg Paul Weimer, Christoph Rogmans, Marion T. van Mackelenbergh, Nicolai Maass, Bernd Clement and Dirk O. Bauerschlag

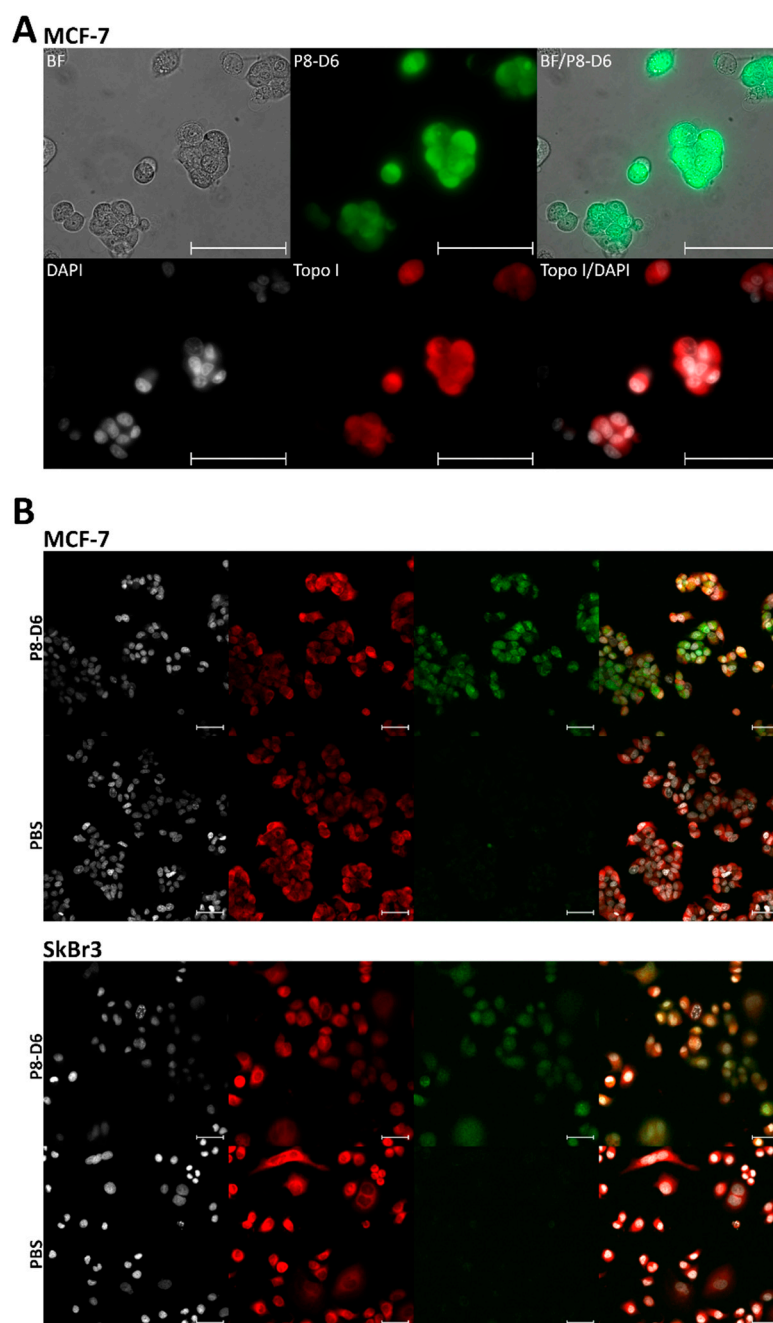

**Figure S1.** Localization of P8-D6. MCF-7 (A, B) and SkBr3 (C) cells were treated with 10 µM P8-D6 (fluorophore: 462Ex/530Em) or control (PBS) for 10 h. P8-D6 was localized *in vitro*. (A) After fixation topoisomerase I was stained using anti-Topo I antibody (Santa Cruz#sc-271285) and imaged (63x) using LSM 880 and software ZEN 2.5 (blue edition). (B, C): After treatment cells were stained with CellTracker™ Deep Red Dye and hoechst 33342 (25x). Fluorescence intensity of P8-D6 was quantified in the nucleus. Fluorescence images show the fluorophore P8-D6 in green, membrane staining (B, C) or topoisomerase expression (A) in red and nucleus staining in white. Scale bars, 50 µm.

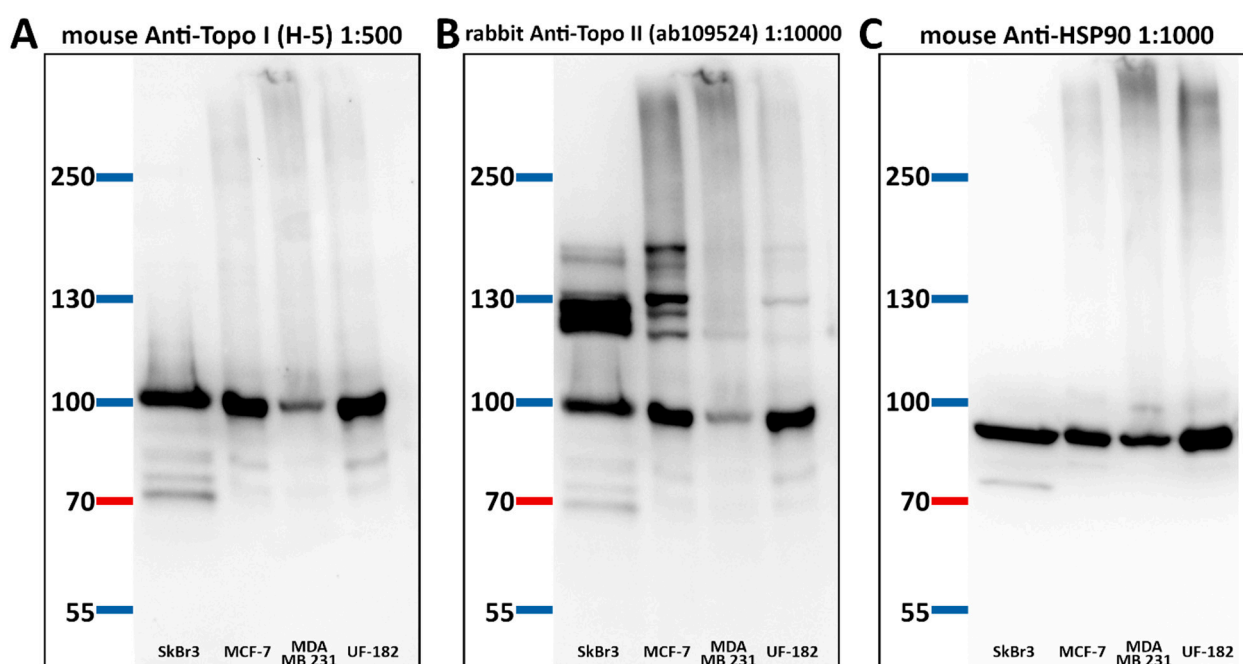

**Figure S2.** Protein expression of Topoisomerase I/II. Lysates of ovarian cancer cells were analysed by western blot to validate Topo I and Topo II protein expressions. In cell lysates Topo I (**A**) at 100 kDa, Topo II  $\alpha$  (**B**) at 174 kDa, Topo II  $\beta$  (**B**) at 180 kDa were detected. HSP 90 (**C**) at 90kDa was used as loading control. After Topo II and before HSP90 detection, the blot was stripped.
